# Supplementary material for: Transcriptome-Wide Single Nucleotide Polymorphisms (SNPs) for Abalone (Haliotis midae): Validation and Application Using GoldenGate Medium-Throughput Genotyping Assays
Source: Int J Mol Sci. 2013 Sep 23;14(9):19341–60. doi: 10.3390/ijms140919341 (PMC3794836; doi:10.3390/ijms140919341)
Supplement: Supplementary File 1 — Supplementary Table S3 (XLSX, 39 KB) [file ijms-14-19341-s001.xlsx]

## Sheet: Table S1
Supplementary Table S1. SNP name, contig, functional annotation, sequence similarity, variant, SNP position and SNP effect for Plex-48. SNPs for which no positions were made available by previous author are indicated in red.
Isolation method	SNP name	EST/Contig	Functional annotation	E-Value	Identity	Variant	SNP position	SNP effect
Bester et al.	3B4_2	3B4	60s Ribosomal protein l8	5.77712e-79	0.938	T/C	561	UTR
	3B4_7					A/T	492	UTR
2008	3D10_1	3D10	Haemocyanin	4e-76	1	A/G	122	UTR
Targeted approach	2H9_2	2H9	Ribosomal protein L22	1e-14	0.82	A/T	177	UTR
Flanking Regions Rhode, 2008	HdSNPc148_820T_C	HdSNPc148	Actin	4.51926e-158	0.974	T/C	-	Synonymous
	HdSNPc106_688C_T	HdSNPc106	Tubulin alpha-1a chain isoform 2	0	0.9895	C/T	-	Synonymous
	HmSNPc4_815C_T	HmSNPc4	Microsatellite sequence	3e-55	0.99	C/T	-	Non-synonymous
	HaSNPdw500_207C_T	HaSNPdw	Microsatellite sequence	3e-50	0.97	C/T	-	UTR
	HmLCS5M193T_A	HmLCS5M	-	-	-	T/A	196	-
	HmLCS5M479C_T		Opacity protein	9.19908e-26	0.5425	C/T	484	Synonymous
	HmLCS55T318G_T	HmLCS55T	Microsatellite sequence	4e-70	0.99	G/T	322	Non-synonymous
	HmRS36T262T_C	HmRS36T	5-Formyltetrahydrofolate cyclo-ligase	4.329e-22	0.6355	T/C	306	Synonymous
in vitro SNPs	SNP101_113	Contig 101	Myosin heavy chain	1.11629e-33	0.842	A/C	113	UTR
	SNP101_201					C/G	201	UTR
	SNP146.2_132	Contig 146	ADP/ATP carrier protein	6.05813e-178	0.835	A/G	132	Synonymous
	SNP146.3_123					T/G	123	Non-synonymous
	SNP149.1_106	Contig 149	Heat shock protein 70	5.46089e-53	0.932	A/C	106	UTR
	SNP149.1_374					C/G	374	Non-synonymous
	SNP149.2_165					A/G	165	Synonymous
	SNP149.4_75					A/G	75	UTR
	SNP149.4_341					T/C	341	UTR
	SNP210_266	Contig 210	-	-	-	T/G	266	-
	SNP214_86	Contig 214	Ribosomal protein l10	9.54587e-76	0.8915	T/C	86	Non-synonymous
	SNP214_434					T/C	434	UTR
	SNP342.2_537	Contig 342	Heat shock protein	6e-23	86	T/C	537	UTR
	SNP449.2_110	Contig 449	s-Adenosylmethionine synthetase isoform type-1	2.46439e-64	0.9365	A/G	110	Non-synonymous
	SNP449.2_443					T/C	443	Synonymous
	SNP1718_109	Contig 1718	Nadh dehydrogenase subunit 1	3.91247e-33	0.9415	A/T	109	UTR
	SNP1833_160	Contig 1833	Alpha tubulin	1.09488e-148	0.9885	A/G	160	UTR
	SNP1834_76	Contig 1834	Tubulin alpha-1a chain- partial	8.77076e-153	0.988	A/G	76	UTR
	SNP1834_464					A/G	464	Non-synonymous
	SNP1949_235	Contig 1949	Ribosomal protein l3	2.21965e-30	0.9225	A/C	235	UTR
	SNP4691_183	Contig 4691	Heat shock protein 70	5.53608e-64	0.914	A/G	183	UTR
	SNP17550.1_463	Contig 17550	Clathrin heavy chain 1	0	0.893	A/G	463	Non-synonymous
	SNP17550.3_221					A/T	221	UTR
	SNP17550.3_555					A/T	555	UTR
in silico SNPs	SNP48_322	Contig 48	Collagen alpha-4 chain	0	0.4605	T/G	322	UTR
	SNP67_164	Contig 67	Collagen alpha-6 partial	3.92944e-119	0.752	A/G	164	UTR
	SNP140_2421	Contig 140	Na+ K+-atpase alpha subunit	0	0.898	T/C	2421	Synonymous
	SNP229_2772	Contig 229	14-3-3 Zeta	1.19486e-108	0.777	T/C	2772	UTR
	SNP300_1828	Contig 300	-	-	-	A/G	1828	-
	SNP972_1055	Contig 972	Myosin heavy chain	0	0.842	T/C	1055	Synonymous
	SNP1001_388	Contig 1001	Cre-sca-1 protein	8.99871e-28	0.8285	T/C	388	UTR
	SNP2091_264	Contig 2091	-	-	-	A/C	264	-
	SNP3129_923	Contig 3129	Arginine kinase	0	0.806	A/G	923	Synonymous
	SNP5837_204*	Contig 5837	Mucus-associated protein partial	1.25405e-51	0.93	T/C	204	Non-synonymous
	SNP13865_165	Contig 13865	Cathepsin l	8.62657e-43	0.6935	T/C	165	UTR
	SNP20648_3041	Contig 20648	Filamin-c isoform 4	0	0.725	A/G	3041	Synonymous

## Sheet: Table S2
Supplementary Table S2. SNP name, contig, functional annotation, sequence similarity, variant, SNP position and SNP effect for Plex-192.
SNP name	EST fragment/Contig	Functional annotation	E-Value	Identity	Variant	SNP position	SNP effect
C31_1387	Contig 31	14-3-3 protein epsilon	1.00357e-141	0.889	A/G	1387	Synonymous
C31_1488					A/G	1488	Synonymous
C45_3002	Contig 45	Kyphoscoliosis peptidase	0	0.5795	A/C	3002	Non-synonymous
C48_636	Contig 48	Collagen alpha-4 chain	0	0.4605	T/C	636	UTR
C48_933					A/G	933	Non-synonymous
C67_2395	Contig 67	Collagen alpha-6 partial	3.86754e-119	0.752	A/T	2395	Synonymous
C102_1408	Contig 102	-	-	-	A/T	1408	-
C140_2112	Contig 140	Na+ K+-atpase alpha subunit	0	0.898	T/G	2112	Synonymous
C140_2421					A/G	2421	Synonymous
C150_320	Contig 150	Cytochrome b-c1 complex subunit mitochondrial-like	5.36882e-137	0.648	A/G	320	Synonymous
C152_797	Contig 152	Transcription elongation factor b polypeptide 1	4.38018e-70	0.96	A/G	797	UTR
C158_67	Contig 158	Alpha- sarcomeric	0	0.8435	T/C	67	Synonymous
C158_238					A/G	238	Synonymous
C184_1379	Contig 184	Chorion peroxidase	5.91679e-119	0.5385	A/C	1379	Synonymous
C229_2772	Contig 229	14-3-3 zeta	1.17604e-108	0.777	A/G	2772	Non-synonymous
C231_2116	Contig 231	Partial hypothetical protein CAPTEDRAFT_59383	2.15781e-07	0.6867	T/C	2116	Synonymous
C236_970	Contig 236	Collagen alpha-4 chain	0	0.4825	T/G	970	Non-synonymous
C250_199	Contig 250	-	-	-	A/G	199	-
C253_1545	Contig 253	pdz and lim domain protein zasp	3.24379e-31	0.5915	A/C	1545	UTR
C300_1828	Contig 300	-	-	-	A/G	1828	-
C300_4738					A/T	4738	-
C300_4982					A/G	4982	-
C300_6993					A/G	6993	-
C311_406	Contig 311	Beta- glucan-binding protein	1.07177e-168	0.438	A/T	406	Non-synonymous
C311_1293					A/C	1293	Non-synonymous
C314_1039	Contig 314	-	-	-	A/G	1039	-
C327_1076	Contig 327	Beta- glucanase	0	0.71	C/G	1076	Synonymous
C347_1008	Contig 347	Ribosome biogenesis protein nsa2 homolog	1.03909e-171	0.931	A/T	1008	UTR
C379_2197	Contig 379	Heat shock protein 90	0	0.9435	A/T	2197	UTR
C387_215	Contig 387	Indoleamine -dioxygenase 2	0	0.636	A/G	215	Synonymous
C387_582					A/G	582	Non-synonymous
C394_1510	Contig 394	Heat shock protein	2.52566e-39	0.723	A/G	1510	UTR
C421_541	Contig 421	Ef-hand calcium binding	4.1437e-05	0.4675	A/G	541	UTR
C428_225	Contig 428	Myosin light chain smooth muscle	1.39705e-55	0.555	A/G	225	Synonymous
C428_306					A/G	306	UTR
C428_2101					A/G	2101	Synonymous
C428_2186					A/G	2186	UTR
C450_1390	Contig 450	Intermediate filament protein ov71	9.45598e-21	0.53	A/G	1390	UTR
C460_1184	Contig 460	Transport protein sec61 subunit alpha 2	0	0.9615	A/G	1184	UTR
C460_1745					A/C	1745	Synonymous
C549_128	Contig 549	Nuclear ribonucleoprotein	3.22031e-71	0.7905	A/T	128	Synonymous
C570_855	Contig 570	Tumor suppressor candidate 5 homolog	3.14432e-06	0.655	A/T	855	Non-synonymous
C570_1064					A/C	1064	UTR
C618_116	Contig 618	S-adenosylmethionine synthase isoform type-2	0	0.8935	A/G	116	UTR
C681_815	Contig 681	Spectrin alpha	0	0.855	A/G	815	Synonymous
C844_440	Contig 844	Selenoprotein 1	6.30967e-29	0.555	A/G	440	Non-synonymous
C844_751					A/G	751	UTR
C853_1199	Contig 853	Myosin heavy chain	1.59192e-142	0.868	A/G	1199	Synonymous
C910_1175	Contig 910	X-box binding protein 1	6.05835e-38	0.5695	A/G	1175	Non-synonymous
C911_290	Contig 911	ATP synthase subunit mitochondrial	0	0.914	A/T	290	UTR
C911_461					T/C	461	UTR
C911_839					A/G	839	UTR
C911_1343					A/T	1343	Synonymous
C929_475	Contig 929	-	-	-	A/C	475	-
C929_734					A/G	734	-
C929_1311					A/C	1311	-
C929_2563					A/G	2563	-
C980_261	Contig 980	-	-	-	A/G	261	-
C1001_964	Contig 1001	Cre-sca-1 protein	8.85697e-28	0.8285	A/T	964	UTR
C1002_85	Contig 1002	Translation factor	3.06611e-43	0.759	A/T	85	UTR
C1002_557					A/T	557	UTR
C1094_579	Contig 1094	Eukaryotic translation initiation factor 5a-1	8.37345e-66	0.801	A/G	579	Synonymous
C1177_137	Contig 1177	Dopamine beta-hydroxylase	6.77012e-163	0.5485	A/C	137	UTR
C1254_187	Contig 1254	Tubulin beta chain-like	0	0.9975	A/G	187	Synonymous
C1254_529					A/G	529	Synonymous
C1363_269	Contig 1363	Na(+) H(+) exchange regulatory cofactor nhe-rf1	2.37446e-63	0.584	A/G	269	Synonymous
C1384_655	Contig 1384	Voltage-dependent anion channel 2	0	0.875	A/G	655	Synonymous
C1384_793					A/T	793	Synonymous
C1449_847	Contig 1449	Kazal-type serine protease inhibitor domain-containing protein 1-like	5.6817e-163	0.5595	A/C	847	UTR
C1462_825	Contig 1462	Protein eef- isoform a	0	0.833	A/G	825	Synonymous
C1462_917					A/C	917	Synonymous
C1462_1238					A/C	1238	Synonymous
C1520_1336	Contig 1520	Collagen alpha-1 chain	0	0.534	A/C	1336	Non-synonymous
C1630_199	Contig 1630	Cytosolic malate dehydrogenase	4.48985e-159	0.824	A/G	199	Synonymous
C1726_472	Contig 1726	-	-	-	T/C	472	UTR
C1783_492	Contig 1783	Cat eye syndrome critical region protein 5	5.39932e-165	0.627	A/C	492	Non-synonymous
C1797_660	Contig 1797	Ornithine decarboxylase antizyme	9.84363e-112	0.6865	A/G	660	UTR
C1797_1023					A/G	1023	Synonymous
C1797_1098					A/G	1098	Non-synonymous
C1813_219	Contig 1813	Protein btg2	3.33993e-46	0.7415	A/C	219	Non-synonymous
C1813_300					A/C	300	Non-synonymous
C1878_506	Contig 1878	Heterogeneous nuclear ribonucleoproteins a2 b1	4.0424e-66	0.76	A/G	506	Synonymous
C2028_1228	Contig 2028	-	-	-	A/T	1228	-
C2028_1328					A/G	1328	-
C2040_468	Contig 2040	Collagen pro alpha-chain	6.35305e-60	0.79	T/C	468	Synonymous
C2040_1251					A/T	1251	Synonymous
C2122_257	Contig 2122	Mammalian ependymin-related protein 1	7.28238e-113	0.5705	A/G	257	Synonymous
C2141_350	Contig 2141	Mitochondrial atp synthase	2.92255e-107	0.625	A/T	350	Non-synonymous
C2141_504					A/C	504	Non-synonymous
C2180_279	Contig 2180	Myosin essential light chain	2.84103e-80	0.7865	A/G	279	Synonymous
C2236_965	Contig 2236	High mobility group-t protein	1.26749e-56	0.6235	A/C	965	Non-synonymous
C2362_847	Contig 2362	Collagen alpha-5 chain	6.23512e-09	0.385	A/T	847	Non-synonymous
C2406_641	Contig 2406	Ribosomal protein l23a	1.98155e-65	0.878	A/G	641	Synonymous
C2558_743	Contig 2558	Neurogenic locus notch homolog protein 2-like	8.86829e-15	0.4645	A/G	743	Non-synonymous
C2735_326	Contig 2735	-	-	-	A/C	326	-
C2899_1354	Contig 2899	Mitochondrial atp synthase beta subunit	0	0.9005	A/C	1354	UTR
C2903_286	Contig 2903	40s Ribosomal protein s17	1.61339e-11	0.904	A/G	286	Synonymous
C2903_1043					A/T	1043	UTR
C2915_875	Contig 2915	Troponin c	1.10459e-61	0.7255	A/G	875	Non-synonymous
C3107_715	Contig 3107	Actin-related protein 2 3 complex subunit 1a	2.80585e-131	0.7725	A/G	715	UTR
C3220_245	Contig 3220	-	-	-	A/T	245	-
C3495_541	Contig 3495	Universal stress protein	4.87095e-54	0.625	A/G	541	UTR
C3676_443	Contig 3676	Actin 2	0	0.988	A/T	443	Non-synonymous
C3835_411	Contig 3835	Sorbitol dehydrogenase	1.02457e-120	0.667	A/G	411	Non-synonymous
C3914_977	Contig 3914	-	-	-	A/C	977	UTR
C4144_389	Contig 4144	Cathepsin d	0	0.7845	A/C	389	UTR
C4147_533	Contig 4147	Collagen alpha-6 chain	2.51788e-09	0.47	C/G	533	UTR
C4181_822	Contig 4181	Protein	2.69956e-30	0.6183	A/T	822	Synonymous
C4181_893					A/C	893	UTR
C4223_662	Contig 4223	Profilin	7.39456e-56	0.4978	A/T	662	UTR
C4463_182	Contig 4463	-	-	-	A/T	182	-
C4593_326	Contig 4593	-	-	-	A/C	326	-
C4778_234	Contig 4778	Beta-ig-h3 fasciclin	7.66018e-153	0.542	A/G	234	UTR
C4778_642					T/C	642	UTR
C4791_1099	Contig 4791	Carboxypeptidase b-like	1.81042e-64	0.5325	A/C	1099	Synonymous
C5054_124	Contig 5054	Cartilage matrix protein	1.79381e-156	0.525	A/G	124	UTR
C5054_1800					A/T	1800	Synonymous
C5106_273	Contig 5106	-	-	-	A/G	273	-
C5106_6741					A/G	6741	-
C5339_366	Contig 5339	Myosin heavy chain	1.25578e-128	0.842	A/G	366	Non-synonymous
C5433_233	Contig 5433	Cytochrome c oxidase subunit mitochondrial-like	0.000153436	0.6033	A/G	233	UTR
C5634_234	Contig 5634	Nidogen 2 precursor	2.54092e-31	0.457	A/G	234	Non-synonymous
C5741_659	Contig 5741	-	-	-	A/C	659	-
C6012_280	Contig 6012	ATP synthase lipid-binding mitochondrial	4.30821e-59	0.7795	A/G	280	Synonymous
C6012_652					C/G	652	UTR
C6061_1289	Contig 6061	Phosphoglycerate mutase	5.37871e-123	0.7925	A/C	1289	UTR
C6631_237	Contig 6631	-	-	-	A/G	237	-
C7947_662	Contig 7947	NADH dehydrogenase subunit 5	0	0.8545	A/G	662	UTR
C7947_1013					A/G	1013	UTR
C7947_1867					A/G	1867	Synonymous
C8539_132	Contig 8539	Calmodulin	5.32794e-60	0.986	T/C	132	UTR
C9238_1342	Contig 9238	-	-	-	T/G	1342	-
C9471_299	Contig 9471	60s Ribosomal protein l8-like protein	0	0.924	A/G	299	UTR
C9511_498	Contig 9511	-	-	-	A/T	498	-
C10524_242	Contig 10524	Protein transport protein sec61 subunit gamma-like	1.08203e-27	0.95	A/G	242	Non-synonymous
C11784_1697	Contig 11784	-	-	-	A/G	1697	Synonymous
C12119_299	Contig 12119	-	-	-	A/G	299	Synonymous
C13865_165	Contig 13865	Cathepsin l	8.49068e-43	0.6935	A/G	165	Non-synonymous
C14033_777	Contig 14033	Myosin heavy chain	7.99548e-143	0.801	A/G	777	Synonymous
C15455_325	Contig 15455	Nucleoside diphosphate kinase	2.74375e-106	0.851	T/C	325	Synonymous
C16314_519	Contig 16314	Guanine nucleotide-binding protein subunit beta-2-like 1	0	0.897	C/G	519	UTR
C17220_332	Contig 17220	Glyceraldehyde-3-phosphate dehydrogenase	4.65059e-104	0.8505	A/G	332	UTR
C17943_1521	Contig 17943	Beta- -glucan-binding protein	2.17672e-91	0.5067	T/G	1521	Non-synonymous
C17963_254	Contig 17963	-	-	-	T/C	254	Synonymous
C17963_499					T/G	499	Non-synonymous
C18184_390	Contig 18184	Fk506-binding protein	6.43446e-50	0.801	A/G	390	Non-synonymous
C18679_62	Contig 18679	Collagen pro alpha-chain	1.38039e-38	0.91	A/G	62	UTR
C18774_676	Contig 18774	-	-	-	A/G	676	-
C18774_877					A/G	877	-
C18782_153	Contig 18782	-	-	-	A/G	153	-
C19500_354	Contig 19500	Acyl- -binding protein	6.78251e-27	0.819	T/C	354	Non-synonymous
C19952_651	Contig 19952	-	-	-	A/G	651	UTR
C20003_92	Contig 20003	Hypothetical protein DAPPUDRAFT_335831	3.04468e-09	0.5786	A/G	92	Synonymous
C20142_203	Contig 20142	60s Ribosomal protein l10a-like protein	2.39911e-109	0.879	T/G	203	Synonymous
C20174_2657	Contig 20174	Cellular nucleic acid-binding	3.96992e-18	0.5815	A/G	2657	UTR
C20267_102	Contig 20267	Polcalcin bra r	5.01587e-05	0.5031	A/G	102	UTR
C20267_179					A/G	179	UTR
C20427_267	Contig 20427	Myosin essential light chain	1.18255e-110	0.8325	A/G	267	Non-synonymous
C20580_186	Contig 20580	-	-	-	A/G	186	-
C20648_3041	Contig 20648	Filamin-c isoform 3	0	0.725	A/G	3041	Synonymous
C20682_843	Contig 20682	Protein	7.29288e-32	0.634	A/T	843	UTR
C20776_135	Contig 20776	Alginate lyase	2.76075e-128	0.69	T/C	135	Non-synonymous
C21068_302	Contig 21068	60s Ribosomal protein l7	4.02426e-121	0.819	A/G	302	Synonymous
C21134_331	Contig 21134	60s Ribosomal protein l22-like	5.40609e-35	0.8675	T/C	331	Synonymous
C21581_136	Contig 21581	Ribosomal protein l19	7.33605e-94	0.925	T/C	136	Synonymous
C21593_75	Contig 21593	Ribosomal protein l15	3.4895e-29	0.998	T/G	75	Non-synonymous
C21645_185	Contig 21645	Tubulin alpha chain-like	6.94202e-42	0.976	T/G	185	UTR
C21673_148	Contig 21673	60s Ribosomal protein l28	7.41077e-57	0.7485	A/G	148	Non-synonymous
C21706_435	Contig 21706	NADH:ubiquinone dehydrogenase	9.02841e-18	0.8015	T/C	435	Non-synonymous
C21880_565	Contig 21880	Zinc-binding dehydrogenase family protein	1.15985e-134	0.5755	A/G	565	Synonymous
C21880_1003					C/G	1003	Synonymous
C21880_1111					A/G	1111	Synonymous
C21908_64	Contig 21908	-	-	-	A/C	64	-
C22317_403	Contig 22317	Extracellular serralysin family	2.18113e-10	0.48	A/T	403	Non-synonymous
C22340_159	Contig 22340	Anoxia-induced grl-like protein	2.96152e-09	0.505	T/C	159	Non-synonymous
C22347_319	Contig 22347	-	-	-	A/G	319	-
C22431_278	Contig 22431	Calcium binding protein 1	2.69043e-05	0.5	A/G	278	Synonymous
C22449_261	Contig 22449	Protein disulfide isomerase	0	0.8035	A/G	261	Non-synonymous
C22491_341	Contig 22491	Protein eef- isoform a	0	0.8725	A/G	341	UTR
C22491_595					A/G	595	UTR
C22491_727					A/G	727	UTR
C22521_249	Contig 22521	Peptidyl-prolyl cis-trans isomerase cyp20-2	3.70501e-40	0.8315	A/T	249	Non-synonymous
C22537_1941	Contig 22537	Cytochrome c oxidase subunit i	0	0.939	A/G	1941	UTR
C22568_597	Contig 22568	Ribosomal protein l3	6.83718e-162	0.907	A/G	597	Non-synonymous
C22574_507	Contig 22574	Hypothetical protein CGI_10005951	3.32272e-16	0.49	A/C	507	Synonymous
C22635_318	Contig 22635	Myosin heavy chain	7.14287e-11	0.8015	A/G	318	UTR

## Sheet: Table S3
Supplementary Table S3. Genetic diversity estimates of the polymorphic SNP markers (Plex-192) for H. midae individuals.
Locus	Minor allele frequency	Heterozygosity		Inbreeding coefficient	Probability
		Observed	Expected		HWE
C31_1387	0.4583	0.417	0.518	0.203	0.445
C31_1488	0.0417	0.083	0.083	0.000	1.000
C45_3002	0.0417	0.083	0.083	0.000	1.000
C67_2395	0.2500	0.000	0.391	1.000	0.002
C102_1408	0.4167	0.333	0.507	0.353	0.255
C140_2421	0.2500	0.333	0.391	0.154	0.558
C150_320	0.1250	0.250	0.228	-0.100	1.000
C152_797	0.2083	0.250	0.344	0.283	0.401
C158_238	0.1667	0.000	0.290	1.000	0.007
C184_1379	0.3750	0.250	0.489	0.500	0.121
C229_2772	0.2500	0.333	0.391	0.154	0.558
C250_199	0.1667	0.167	0.290	0.436	0.254
C253_1545	0.2917	0.250	0.431	0.431	0.195
C300_1828	0.1250	0.083	0.228	0.645	0.130
C300_4738	0.2500	0.167	0.391	0.585	0.088
C300_4982	0.2500	0.167	0.391	0.585	0.090
C300_6993	0.3333	0.333	0.464	0.290	0.342
C311_1293	0.0417	0.083	0.083	0.000	1.000
C314_1039	0.1250	0.083	0.228	0.645	0.133
C327_1076	0.0833	0.167	0.159	-0.048	1.000
C347_1008	0.2500	0.500	0.391	-0.294	1.000
C387_215	0.5417	0.417	0.518	0.203	0.450
C387_582	0.5000	0.333	0.522	0.371	0.234
C394_1510	0.5000	0.500	0.522	0.043	0.667
C421_541	0.0833	0.000	0.159	1.000	0.047
C428_2101	0.3750	0.583	0.489	-0.203	0.913
C428_2186	0.2083	0.417	0.344	-0.222	1.000
C428_225	0.2500	0.500	0.391	-0.294	1.000
C428_306	0.0417	0.083	0.083	0.000	1.000
C460_1184	0.2500	0.000	0.391	1.000	0.001
C460_1745	0.5000	0.667	0.522	-0.294	0.948
C570_1064	0.2917	0.417	0.431	0.035	0.708
C570_855	0.0417	0.083	0.083	0.000	1.000
C618_116	0.2083	0.250	0.344	0.283	0.399
C844_440	0.1667	0.333	0.290	-0.158	1.000
C853_1199	0.1667	0.333	0.290	-0.158	1.000
C910_1175	0.0417	0.083	0.083	0.000	1.000
C911_1343	0.4167	0.500	0.507	0.015	0.708
C911_290	0.0833	0.167	0.159	-0.048	1.000
C911_839	0.0417	0.083	0.083	0.000	1.000
C929_2563	0.3750	0.417	0.489	0.154	0.527
C929_475	0.2083	0.250	0.344	0.283	0.407
C929_734	0.0417	0.083	0.083	0.000	1.000
C980_261	0.0833	0.159	0.167	-0.048	1.000
C1002_85	0.0417	0.083	0.083	0.000	1.000
C1094_579	0.0833	0.167	0.159	-0.048	1.000
C1177_137	0.3333	0.333	0.464	0.290	1.000
C1254_187	0.6667	0.333	0.464	0.290	0.339
C1254_529	0.3333	0.500	0.464	-0.082	0.355
C1363_269	0.3333	0.167	0.159	-0.048	0.830
C1384_655	0.0833	0.167	0.159	-0.048	1.000
C1384_793	0.0833	0.167	0.159	-0.048	1.000
C1449_847	0.0833	0.250	0.228	-0.100	1.000
C1462_825	0.1250	0.500	0.522	0.043	1.000
C1462_917	0.5000	0.083	0.083	0.000	0.667
C1520_1336	0.0417	0.500	0.507	0.015	1.000
C1630_199	0.4167	0.250	0.228	-0.100	0.708
C1783_492	0.1250	0.000	0.000	0.000	1.000
C1797_660	0.0000	0.000	0.290	1.000	0.000
C1813_219	0.1667	0.250	0.228	-0.100	0.006
C1813_300	0.1250	0.083	0.083	0.000	1.000
C1878_506	0.0417	0.083	0.083	0.000	1.000
C2028_1228	0.0417	0.083	0.083	0.000	1.000
C2028_1328	0.0417	0.333	0.290	-0.158	1.000
C2040_1251	0.1667	0.083	0.083	0.000	1.000
C2122_257	0.0417	0.583	0.489	-0.203	1.000
C2141_350	0.3750	0.667	0.464	-0.467	0.913
C2141_504	0.3333	0.333	0.391	0.154	1.000
C2180_279	0.2500	0.333	0.391	0.154	0.568
C2236_965	0.0417	0.083	0.083	0.000	1.000
C2406_641	0.2917	0.583	0.431	-0.375	1.000
C2558_743	0.2917	0.417	0.431	0.035	0.706
C2735_326	0.0417	0.083	0.083	0.000	1.000
C2899_1354	0.0417	0.083	0.083	0.000	1.000
C2903_1043	0.2500	0.333	0.391	0.154	0.560
C2915_875	0.2917	0.250	0.431	0.431	0.193
C3495_541	0.2083	0.250	0.344	0.283	0.403
C3676_443	0.0417	0.083	0.083	0.000	1.000
C3220_245	0.0833	0.000	0.159	1.000	0.044
C3835_411	0.4167	0.500	0.507	0.015	0.706
C3914_977	0.1250	0.250	0.228	-0.100	1.000
C4181_822	0.0417	0.083	0.083	0.000	1.000
C4181_893	0.1667	0.167	0.290	0.436	0.256
C4223_662	0.1250	0.250	0.228	-0.100	1.000
C4463_182	0.0417	0.083	0.083	0.000	1.000
C4593_326	0.2083	0.417	0.344	-0.222	1.000
C4778_234	0.0417	0.083	0.083	0.000	1.000
C4791_1099	0.5000	0.500	0.522	0.043	0.669
C5054_124	0.1667	0.333	0.290	-0.158	1.000
C5106_273	0.0833	0.167	0.159	-0.048	1.000
C5106_6741	0.0417	0.083	0.083	0.000	1.000
C5339_366	0.1250	0.250	0.228	-0.100	1.000
C5433_233	0.4583	0.583	0.518	-0.132	0.858
C5634_234	0.3333	0.333	0.464	0.290	0.342
C5741_659	0.2917	0.417	0.431	0.035	0.712
C6012_280	0.4583	0.417	0.518	0.203	0.456
C6061_1289	0.3333	0.667	0.464	-0.467	1.000
C7947_1013	0.5000	0.000	0.522	1.000	0.001
C7947_1867	0.4167	0.000	0.507	1.000	0.000
C11784_1697	0.0833	0.167	0.159	-0.048	1.000
C12119_299	0.1250	0.250	0.228	-0.100	1.000
C13865_165	0.2500	0.500	0.391	-0.294	1.000
C14033_777	0.0417	0.083	0.083	0.000	1.000
C17220_332	0.0833	0.167	0.159	-0.048	1.000
C18184_390	0.2500	0.167	0.391	0.585	0.086
C18679_62	0.3750	0.250	0.489	0.500	0.120
C18774_676	0.0417	0.083	0.083	0.000	1.000
C19952_651	0.0417	0.083	0.083	0.000	1.000
C20174_2657	0.2500	0.500	0.391	-0.294	1.000
C20267_102	0.2500	0.333	0.391	0.154	0.567
C20427_267	0.0833	0.167	0.159	-0.048	1.000
C20648_3041	0.0833	0.167	0.159	-0.048	1.000
C21068_302	0.1250	0.250	0.228	-0.100	1.000
C21880_1003	0.3750	0.750	0.489	-0.571	1.000
C21880_1111	0.4583	0.583	0.518	-0.132	0.856
C21880_565	0.0833	0.000	0.159	1.000	0.042
C21908_64	0.1667	0.333	0.290	-0.158	1.000
C22317_403	0.5000	0.333	0.522	0.371	0.233
C22347_319	0.5000	0.167	0.522	0.690	0.026
C22431_278	0.0417	0.083	0.083	0.000	1.000
C22449_261	0.2500	0.333	0.391	0.154	0.558
C22491_341	0.0417	0.083	0.083	0.000	1.000
C22491_595	0.0833	0.167	0.159	-0.048	1.000
C22491_727	0.3333	0.167	0.464	0.651	0.044
C22521_249	0.0417	0.083	0.083	0.000	1.000
C22537_1941	0.1667	0.000	0.290	1.000	0.007
C22568_597	0.1667	0.333	0.290	-0.158	1.000
C22574_507	0.0833	0.167	0.159	-0.048	1.000
C22635_318	0.4583	0.250	0.518	0.529	0.092
